# Supplementary material
Source: PubMed Central journal article supplement (PMC2812047)
Supplement: fj.09-137778_1.pdf [file fj.09-137778_1.pdf]

**Supplemental Table 1:** List of oligonucleotide primers used in this study. Restriction sites that were incorporated into the primer sequence are underlined and indicated.

| primer       | sequence                                            |
|--------------|-----------------------------------------------------|
| hGg5-del-5S  | 5' -CTTTTG <u>CTCGAGATGAAACAGGCG</u> -3' ; XhoI     |
| hg5-del-3A   | 5' -CAGGGATCCTGAAATGTGTTT <u>TAGG</u> -3' ; BamHI   |
| hg3-del-5S   | 5' -TGAGGAT <u>CCAATAAAGCTCCTAGTCCA</u> -3' ; BamHI |
| hg3-del-3A   | 5' -ATGTCTAGAGGCAGAGGACAGGTT-3' ; XbaI              |
| hAg5-del-5S  | 5' -ATTTT <u>TCTCGAGATGAAACAGTCA</u> -3' ; XhoI     |
| he5-del-5S   | 5' -AATACTCGAGACAAAGTAGCCAGT -3' ; XhoI             |
| he5-del-3A   | 5' -TAAAACAGAA <u>TCTC</u> ACCCAGTTC -3' ; EcoRI    |
| he3-del-5S   | 5' -CGAA <u>TCACTAGCAAGCTCTCAGG</u> -3' ; EcoRI     |
| he3-del-3A   | 5' -CCAAAGCTTGTCAAAAAATCTCT -3' ; HindIII           |
| DT-5S2       | 5' -TGGACAACCTCAAGGGCACT-3' ;                       |
| DT-3A1       | 5' -GGTGAATTCCTTGCCAAAGTT-3' ;                      |
| DT-5S1       | 5' -CTCATGGCAAGAAGGTGCTA-3' ;                       |
| DT-3A2       | 5' -TTCTGATAGGCAGCCTGCAT-3' ;                       |
| 3C-HS2/3/4   | 5' -TTGTCTATTTCTCTCTCTAACATAGTTGTC-3' ;             |
| 3C- $\gamma$ | 5' -CTCTCATCTGTAAGATGCAAATAGTAAGC-3' ;              |
| 3C- $\beta$  | 5' -CCTCTTATCTTCCTCCCACAGCT-3' ;                    |
| 3C-Ercc3-a   | 5' -GTAGCACGTGTCTAGCCTTG-3' ;                       |
| 3C-Ercc3-b   | 5' -TTAGGCCGGAGTAGCCATTC-3' ;                       |
